# Supplementary material for: Managing Advance Admission Requests for Obstetric Care
Source: Atypon-hosted journal article supplement (doi:10.1287/ijoc.2021.1093), 2021-11-10
Supplement: ijoc.2021.1093.sm2.pdf [file ijoc.2021.1093.sm2.pdf]

**Online Supplement B. Data Supplement for paper “Managing advance admission requests for obstetric care”**

In the paper, we compare different control policies for small-size base case and real application. Each policy is evaluated nearly exactly with a sufficiently long simulation of  $10^6$  days.

In the following, we will provide all the data used in the experiments, including number of beds, overcapacity penalty, request arrival rates, the probability distribution of ELT, the probability distribution of the deviation from EAT, time window for TWQ and MTWQ, and the data for sensitivity analysis. Specially, Online Supplement B-I includes the data for small-size base case, and Online Supplement B-II includes the data for real application. In addition, Online Supplement B-III shows quotas for small cases.

In the simulation, the pregnancy day and delivery day of each arriving pregnant woman are randomly generated. Since the simulation time is sufficiently long, i.e.,  $10^6$  days, these randomly generated data have little effect on the rewards. Therefore, this part of data is ignored here.

## Online Supplement B-I. Data for small-size simple base case

Number of beds:  $B=32$

Overcapacity penalty:  $b=2.5$

Request arrival rates:  $\lambda_t = \lambda_t^{EAT} = 40$

The probability distribution of ELT:  $p_i^{ELT} = \{0.1, 0.1, 0.8\}$  for  $i = \{3, 4, 5\}$

The probability distribution of the deviation from EAT:  $p_j^\delta = \{0.15, 0.7, 0.15\}$  for  $j = \{-1, 0, 1\}$

Time window for TWQ and MTWQ: 3 days

Data for sensitivity analysis:

- 1) Effect of the overcapacity cost  $b$  with  $b = \{1.5, 2, 2.5, 3, 3.5\}$ ;
- 2) Effect of the arrival rate  $\lambda$  with  $\lambda_t^{EAT} = \{20, 30, 40, 50, 60\}$ ;
- 3) Effect of the probability distribution of ELT,  $p_i^{ELT} = \{0.3, 0.3, 0.4\}$  for  $i = \{3, 4, 5\}$  (denoted as ELT1),  
and  $p_i^{ELT} = \{0.2, 0.2, 0.2, 0.2, 0.2\}$  for  $i = \{2, 3, 4, 5, 6\}$  (denoted as ELT2);

- 4) The effect of the probability distribution of the deviation from EAT, as follows:

EAT1:  $p_j^\delta = \{0.25, 0.5, 0.25\}$  for  $j = \{-1, 0, 1\}$

EAT2:  $p_j^\delta = \{0.33, 0.34, 0.33\}$  for  $j = \{-1, 0, 1\}$

EAT3:  $p_j^\delta = \{0.43, 0.34, 0.23\}$  for  $j = \{-1, 0, 1\}$

EAT4:  $p_j^\delta = \{0.2, 0.2, 0.2, 0.2, 0.2\}$  for  $j = \{-3, -2, -1, 0, 1\}$

EAT5:  $p_j^\delta = \{0.1, 0.1, 0.1, 0.1, 0.2, 0.1, 0.1, 0.1, 0.1\}$  for  $j = \{-4, -3, -2, -1, 0, 1, 2, 3, 4\}$ ;

- 5) Effect of the arrival patterns, as follows:

AP1: Seasonal demand in 3 days with  $\lambda_t^{EAT} = \{20, 40, 60\}$

AP2: Seasonal demand in 3 days with arrival rate  $\lambda_t^{EAT} = \{40, 60, 40\}$

AP3: Seasonal demand in 5 days with arrival rate  $\lambda_t^{EAT} = \{20, 30, 40, 50, 60\}$

AP4: Seasonal demand in 5 days with arrival rate  $\lambda_t^{EAT} = \{40, 50, 60, 50, 40\}$

AP5: Seasonal demand in 5 days with arrival rate  $\lambda_t^{EAT} = \{30, 60, 60, 60, 30\}$

6) Effect of service duration, as follows:

SD1: Service duration is 1, 2, or 3 days with respective probabilities of 0.15, 0.7, 0.15

SD2: Service duration is 1, 2, or 3 days with respective probabilities of 0.33, 0.34, 0.33

SD3: Service duration is 1, 2, or 3 days with respective probabilities of 0.25, 0.5, 0.25

SD4: Service duration is 1, 2, 3, or 4 days, each with probability 0.25

SD5: Service duration is 1, 2, 3, 4, or 5 days, each with probability 0.2

## Online Supplement B-II. Data for the real-size obstetrics unit

Number of beds:  $B=100$

Overcapacity penalty:  $b=2.5$

Request arrival rates:  $\lambda_t = \lambda_t^{EAT} = 35$

Expected length of stay:  $E[L] = 3.5$

$L$  is assumed to be uniformly distributed and equal to 2, 3, 4, or 5 with a probability of 0.25.

ELT is bounded by [140, 224].

The probability distribution of ELT:

| $i$         | $196 \leq i \leq 223$ | $140 \leq i \leq 195$ | $84 \leq i \leq 139$ |
|-------------|-----------------------|-----------------------|----------------------|
| $p_i^{ELT}$ | 0.0078                | 0.0126                | 0.0014               |

The probability distribution of the deviation from EAT:

| $j$              | $p_j^\delta$ |        |        |        |        |        |        |        |        |        |
|------------------|--------------|--------|--------|--------|--------|--------|--------|--------|--------|--------|
| $j=-35 \sim -26$ | 0.0022       | 0.0011 | 0.0011 | 0.0024 | 0.0029 | 0.0026 | 0.0012 | 0.0051 | 0.003  | 0.0038 |
| $j=-25 \sim -16$ | 0.003        | 0.0034 | 0.0037 | 0.0053 | 0.0111 | 0.0077 | 0.0087 | 0.0074 | 0.0085 | 0.0086 |
| $j=-15 \sim -6$  | 0.0102       | 0.0164 | 0.015  | 0.0156 | 0.0156 | 0.0189 | 0.0183 | 0.0252 | 0.0373 | 0.0334 |
| $j=-5 \sim -4$   | 0.0275       | 0.0362 | 0.0324 | 0.0315 | 0.0333 | 0.0527 | 0.0378 | 0.0365 | 0.0351 | 0.0365 |
| $j=5 \sim 14$    | 0.0334       | 0.0387 | 0.0472 | 0.0384 | 0.0303 | 0.0349 | 0.0263 | 0.0223 | 0.0189 | 0.02   |
| $j=15 \sim 21$   | 0.0135       | 0.0073 | 0.0045 | 0.0017 | 0.002  | 0.0013 | 0.0014 |        |        |        |

Time window for TWQ and MTWQ: 30 days

Data for sensitivity analysis:

- 1) Effect of overcapacity cost  $b$  with  $b = \{1.5, 2, 2.5, 3, 3.5\}$  for the real base case;
- 2) Effect of arrival rate  $\lambda$  with  $\lambda_t^{EAT} = \{5, 15, 25, 35, 45, 55, 65\}$  for the real base case;
- 3) Effect of the arrival patterns, as follows:

AP1: Cycle length is 6 days with  $\lambda_t^{EAT} = \{5, 5, 5, 65, 65, 65\}/\text{day}$

AP2: Cycle length is 6 days with  $\lambda_t^{EAT} = \{15, 15, 15, 55, 55, 55\}/\text{day}$

AP3: Cycle length is 6 days with  $\lambda_t^{EAT} = \{25, 25, 25, 45, 45, 45\}/\text{day}$

AP4: Cycle length is 6 days with  $\lambda_t^{EAT} = \{5, 15, 25, 35, 45, 55\}/\text{day}$

AP5: Cycle length is 6 days with  $\lambda_t^{EAT} = \{15, 15, 65, 65, 15, 15\}/\text{day}$

AP6: Cycle length is 10 days with  $\lambda_t^{EAT} = \{5, 5, 5, 5, 5, 65, 65, 65, 65, 65\}/\text{day}$

AP7: Cycle length is 10 days with  $\lambda_t^{EAT} = \{5, 15, 25, 35, 45, 55, 65, 55, 45, 35\}/\text{day}$

**Online Supplement B-III. Quotas for small cases**

Table B-1 Quotas for small cases

| Parameters       | EATQ |                  |                            | TWQ                      | MTWQ               | ADVQ             | PQ               |    |
|------------------|------|------------------|----------------------------|--------------------------|--------------------|------------------|------------------|----|
|                  | Sim  | LP               | NA                         |                          |                    |                  |                  |    |
| <i>b</i>         | 1.5  | 34               | 34.9                       | 34.0                     | 113                | 101              | 33               | 96 |
|                  | 2    | 32               | 31.9                       | 32.0                     | 106                | 96               | 31               | 96 |
|                  | 2.5  | 31               | 30.4                       | 31.0                     | 100                | 92               | 30               | 96 |
|                  | 3    | 30               | 29.4                       | 30.2                     | 82                 | 90               | 30               | 96 |
|                  | 3.5  | 30               | 28.7                       | 29.7                     | 78                 | 88               | 29               | 96 |
| Arrival Rate     | 20   | ∞                | ∞                          | ∞                        | ∞                  | ∞                | ∞                | 96 |
|                  | 30   | 32               | ∞                          | ∞                        | 98                 | 93               | 34               | 96 |
|                  | 40   | 31               | 30.4                       | 31.0                     | 100                | 92               | 30               | 96 |
|                  | 50   | 31               | 30.3                       | 30.8                     | 86                 | 94               | 31               | 96 |
|                  | 60   | 31               | 30.3                       | 30.8                     | 95                 | 87               | 31               | 96 |
| ELT              | Base | 31               | 30.4                       | 31.0                     | 100                | 92               | 30               | 96 |
|                  | ELT1 | 31               | 30.4                       | 31.0                     | 89                 | 92               | 30               | 96 |
|                  | ELT2 | 31               | 30.4                       | 31.0                     | 92                 | 92               | 30               | 96 |
| EAT              | Base | 31               | 30.4                       | 31.0                     | 100                | 92               | 30               | 96 |
|                  | EAT1 | 31               | 30.4                       | 30.7                     | 91                 | 92               | 30               | 96 |
|                  | EAT2 | 31               | 30.4                       | 30.7                     | 91                 | 92               | 30               | 96 |
|                  | EAT3 | 31               | 30.4                       | 30.7                     | 92                 | 92               | 30               | 96 |
|                  | EAT4 | 31               | 30.4                       | 30.5                     | 93                 | 92               | 30               | 96 |
|                  | EAT5 | 31               | 30.4                       | 30.9                     | 91                 | 91               | 30               | 96 |
| Arrival Pattern  | AP1  | {∞,31,31}        | {∞,33.5, 33.1}             | {∞, 31,30.8}             | {∞,100,95}         | {∞,92,87}        | {∞,30,31}        | 96 |
|                  | AP2  | {31,31,31}       | {30.4,30.3,30.4}           | {31,30.8, 31}            | {100,95,100}       | {92,87,92}       | {30,31,30}       | 96 |
|                  | AP3  | {∞,32,31,31,31}  | {∞,∞,31.4,28.7,34.4}       | {∞, ∞,31,30.8,30.8}      | {∞,98,100,86,95}   | {∞,93,92,94,87}  | {∞,34,30,31,31}  | 96 |
|                  | AP4  | {31,31,31,31,31} | {30.4,30.3,30.3,30.3,30.4} | {31,30.8,30.8,30.8,30.8} | {100,86,95,86,100} | {92,94,87,94,92} | {30,31,31,31,30} | 96 |
|                  | AP5  | {32,31,31,31,32} | {∞,30.4,30.2,30.4, ∞}      | {∞,30.8,30.8, 30.8, ∞}   | {98,95,95,95,98}   | {93,87,87,87,93} | {34,31,31,31,34} | 96 |
| Service duration | SD1  | 15               | 13.6                       | /                        | 38                 | 44               | 15               | 48 |
|                  | SD2  | 14               | 13.6                       | /                        | 39                 | 43               | 14               | 48 |
|                  | SD3  | 15               | 13.6                       | /                        | 38                 | 44               | 15               | 48 |
|                  | SD4  | 11               | 10.6                       | /                        | 30                 | 34               | 11               | 38 |
|                  | SD5  | 9                | 8.6                        | /                        | 26                 | 28               | 9                | 32 |
